# Supplementary figures and images for: Comparative Analysis of the Chloroplast Genomes of Eight Species of the Genus Lirianthe Spach with Its Generic Delimitation Implications
Source: MDPI journal article supplement (doi:10.3390/ijms25063506), 2024-03-20

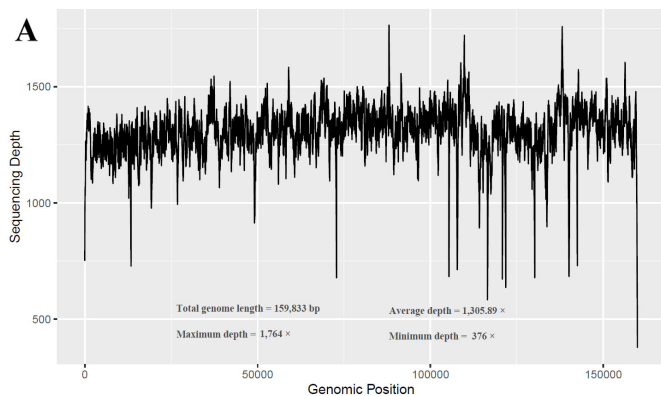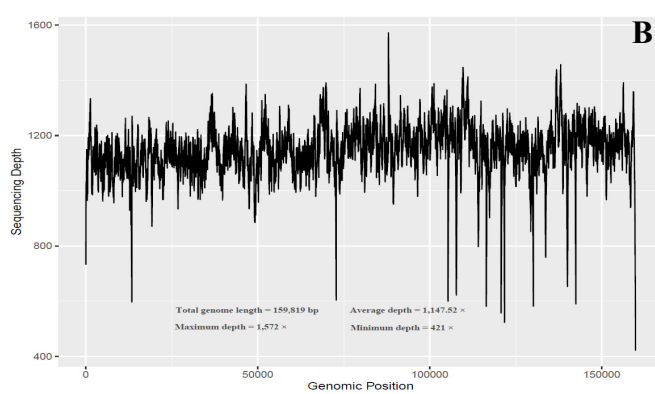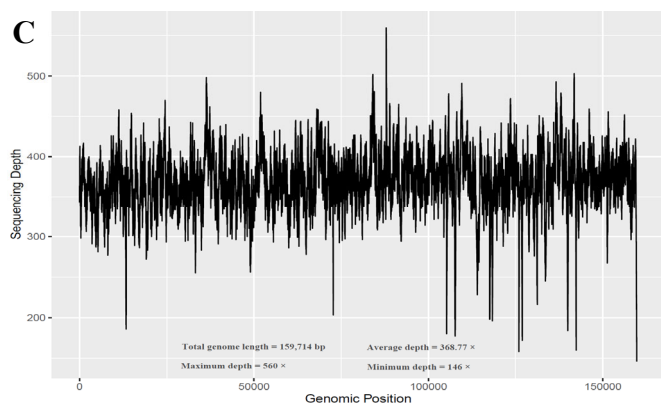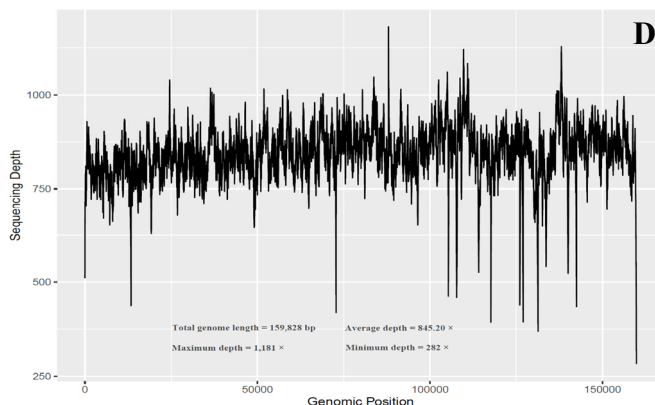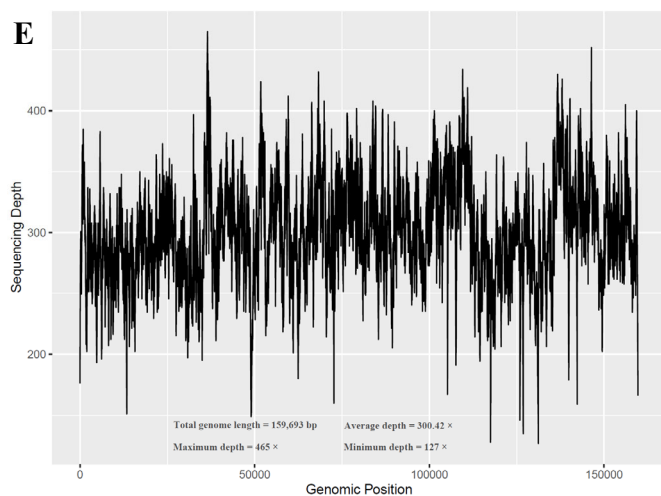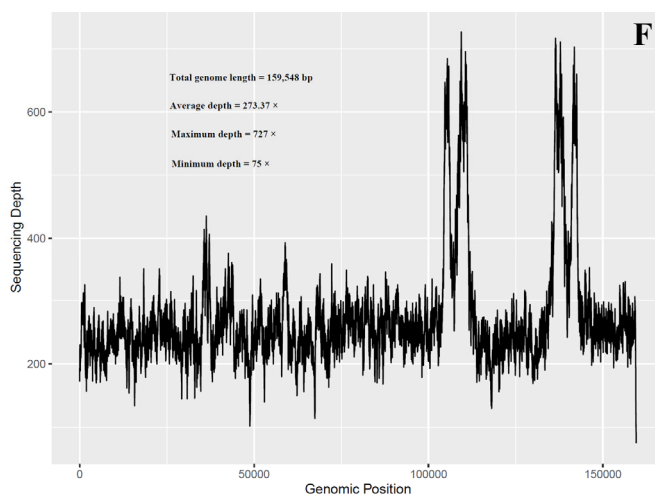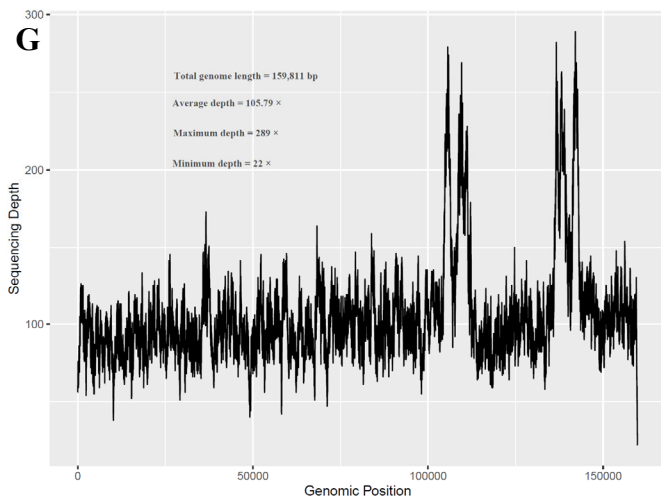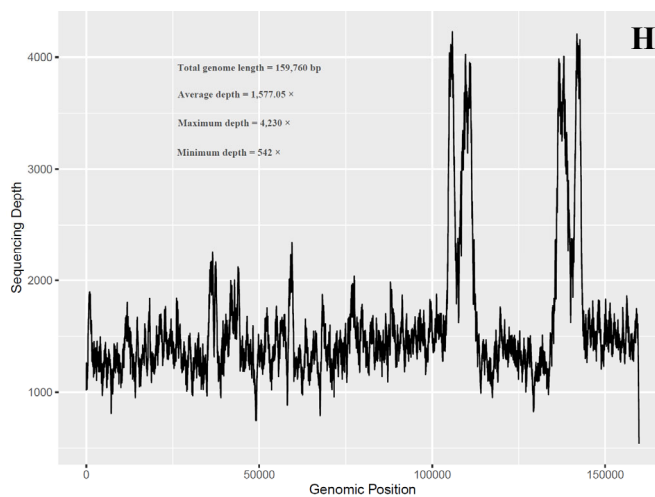

Supplement: s1 [file s1]
